# Supplementary material
Source: MDPI journal article supplement (https://www.mdpi.com/2073-4441/16/1/142)
Supplement: s1 [file s1]

Table S3: Calibration of newly introduced factors and errors.

| Case         | A factor associated with mass transfer resistance | A factor associated with degradation enhancement | Error (µg/L) |
|--------------|---------------------------------------------------|--------------------------------------------------|--------------|
| C73-L100-S   | <b>0.2</b>                                        | 1                                                | 14.6         |
|              | 1                                                 | 1                                                | 22.2         |
| C43-L200-S   | 1                                                 | <b>45</b>                                        | 2.07         |
|              | 1                                                 | 1                                                | 70.9         |
| C190-L400-S  | 1                                                 | <b>90</b>                                        | 3.75         |
|              | 1                                                 | 1                                                | 1363         |
| C100-L100-S  | <b>0.2</b>                                        | 1                                                | 1.83         |
|              | 1                                                 | 1                                                | 8.53         |
| C100-L200-S  | 1                                                 | <b>45</b>                                        | 1.42         |
|              | 1                                                 | 1                                                | 161          |
| C100-L400-S  | 1                                                 | <b>90</b>                                        | 3.13         |
|              | 1                                                 | 1                                                | 718          |
| C76-L050-U   | <b>0.4</b>                                        | 1                                                | 0.079        |
|              | 1                                                 | 1                                                | 0.080        |
| C79-L200-U   | <b>0.6</b>                                        | 1                                                | 2.40         |
|              | 1                                                 | 1                                                | 1.29         |
| C236-L050-U  | <b>0.4</b>                                        | 1                                                | 0.076        |
|              | 1                                                 | 1                                                | 0.080        |
| C171-L200-U  | <b>0.6</b>                                        | 1                                                | 2.63         |
|              | 1                                                 | 1                                                | 7.52         |
| C050G-L050-U | <b>0.4</b>                                        | 1                                                | 351          |
|              | 1                                                 | 1                                                | 352          |

Note: Factor values for calibration were highlight in bold.
